# Supplementary material
Source: PubMed Central journal article supplement (PMC2928877)
Supplement: NIHMS198458-supplement-1.pdf [file NIHMS198458-supplement-1.pdf]

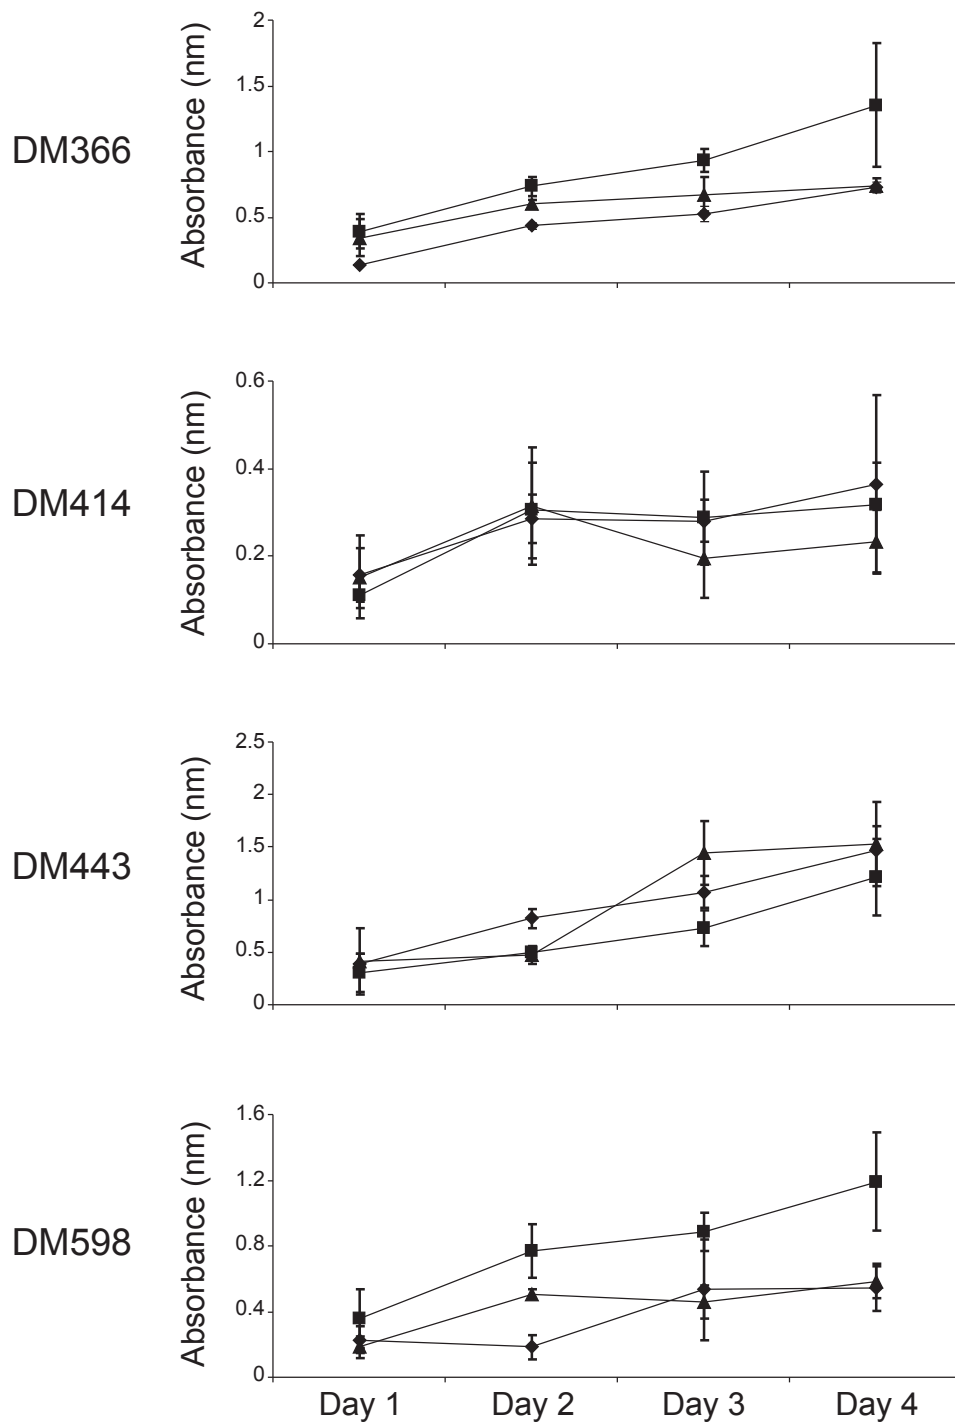

**Supplemental Figure 1.** Knockdown of Ra1A and Ra1B do not affect growth and viability of melanoma cell lines. DM366, DM414, DM443 and DM598 cell lines stably expressing a scramble shRNA (◆), Ra1A shRNA (■) or Ra1B shRNA (▲) were plated in a 96-well plate at 5000 cells per well. 1-4 days following cell seeding, absorbance at 540 nm (+/- SD) was measured 4 hours following the addition of 0.2 mg/mL MTT to the media.
